# Supplementary material for: A resource-rational theory of set size effects in human visual working memory
Source: eLife journal article supplement (doi:10.7554/elife.34963), 2018-08-07
Supplement: supp [file elife-34963-supp-v1.zip]

Archive with 6 entries (6 files):
- elife_poa_e34963_Figure_2_figure_supplement_1.pdf
- elife_poa_e34963_Source_code_1.m
- elife_poa_e34963_Transparent_Reporting_Form.pdf
- elife_poa_e34963_Appendix_1_figure2.pdf
- elife_poa_e34963_Source_code_2.m
- elife_poa_e34963_Appendix_1_figure1.pdf
