# Supplementary material for: A resource-rational theory of set size effects in human visual working memory
Source: eLife journal article supplement (doi:10.7554/elife.34963), 2018-08-07
Supplement: supp [file elife-34963-supp-v1.zip › elife_poa_e34963_Figure_2_figure_supplement_1.pdf]

Circular variance

Circular kurtosis

Anderson & Awh  
2012 (180 deg)

Anderson & Awh  
2012 (360 deg)

Anderson et al.  
2011 (Exp 1)

Rademaker et al.  
2012

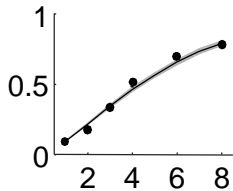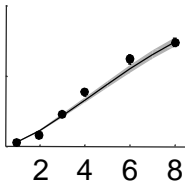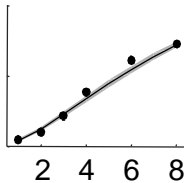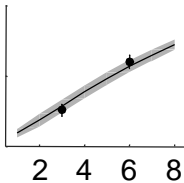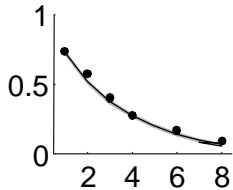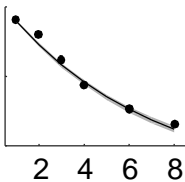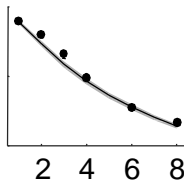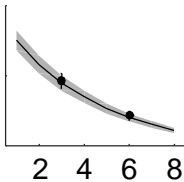

• Data — Model

Set size
