# Supplementary figures and images for: A resource-rational theory of set size effects in human visual working memory
Source: eLife journal article supplement (doi:10.7554/elife.34963), 2018-08-07

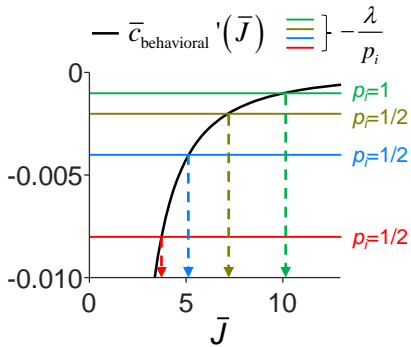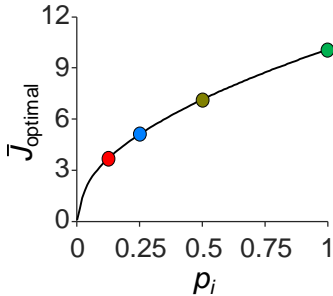

Supplement: supp [file elife-34963-supp-v1.zip › elife_poa_e34963_Appendix_1_figure2.pdf]

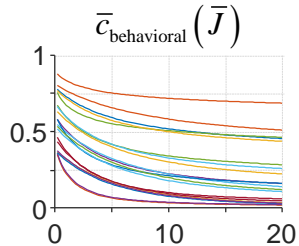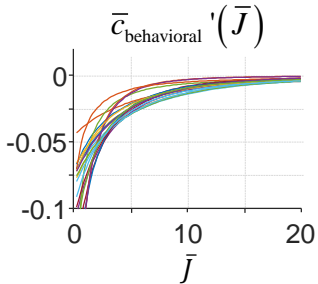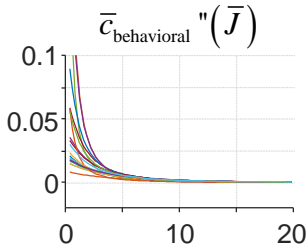

Supplement: supp [file elife-34963-supp-v1.zip › elife_poa_e34963_Appendix_1_figure1.pdf]
